# Supplementary material for: Imbalanced positive selection maintains the functional divergence of duplicated DIHYDROKAEMPFEROL 4-REDUCTASE genes
Source: PubMed Central journal article supplement (PMC5155217; doi:10.1038/srep39031), 2016-12-14
Supplement: srep39031-s1.pdf [file srep39031-s1.pdf]

**Supplementary information for “Imbalanced positive selection maintains the functional divergence of duplicated *DIHYDROKAEMPFEROL 4-REDUCTASE* genes”**

Yi-Wen Chen<sup>1,†</sup>, Bing-Hong Huang<sup>2,†</sup>, Chia-Lung Huang<sup>2</sup>, Jian Gao<sup>3</sup>, Pei-Chun Liao<sup>2,\*</sup>

**Supplementary Table 1** Topological tests to determine the best input tree for PAML analyses. The result revealed that the exon tree could not reject better tree topology reconstructed by intron sequences.

| Rank | Item        | obs   | au    | np    | bp    | pp       | kh    | sh    | wkh   | wsh   |
|------|-------------|-------|-------|-------|-------|----------|-------|-------|-------|-------|
| 1    | intron tree | -49.4 | 0.797 | 0.845 | 0.842 | 1.000    | 0.849 | 0.849 | 0.849 | 0.849 |
| 2    | extron tree | 49.4  | 0.203 | 0.155 | 0.158 | 4.00E-22 | 0.151 | 0.151 | 0.151 | 0.151 |

au, *P*-value of the approximately unbiased test.

np, bootstrap probability of the selection.

bp, same as np but calculated directly from a set of replicates with  $r_k=1$ , where  $r_k$  is the scale for  $K$  sets of replicates.

pp, Bayesian posterior probability (PP) calculated by the BIC approximation.

kh, *P*-value of the Kishino-Hasegawa (KH) test.

sh, *P*-value of the Shimodaira-Hasegawa (SH) test.

wkh, *P*-value of the weighted Kishino-Hasegawa (WKH) test.

wsh, *P*-value of the weighted Shimodaira-Hasegawa (WSH) test.

**Supplementary Table 2** Topological tests for two evolutionary hypotheses of *Scutellaria DFR*. The result showed that the hypothesis “speciation after duplication” was the best scenario, and the hypothesis “duplication after speciation” was rejected by all tests ( $P < 0.05$ ).

| Rank | Item (Hypothesis)                | obs    | au    | np    | bp    | pp     | kh    | sh    | wkh   | wsh   |
|------|----------------------------------|--------|-------|-------|-------|--------|-------|-------|-------|-------|
| 1    | H1: Speciation after duplication | -436.7 | 0.994 | 0.995 | 0.996 | 1.000  | 0.993 | 0.993 | 0.993 | 0.993 |
| 2    | H2: Duplication after speciation | 436.7  | 0.006 | 0.005 | 0.004 | 2E-190 | 0.007 | 0.007 | 0.007 | 0.007 |

au,  $P$ -value of the approximately unbiased test.

np, bootstrap probability of the selection.

bp, same as np, but calculated directly from a set of replicates with  $r_k=1$ , where  $r_k$  is the scale for  $K$  sets of replicates.

pp, Bayesian posterior probability (PP) calculated by the BIC approximation.

kh,  $P$ -value of the Kishino-Hasegawa (KH) test.

sh,  $P$ -value of the Shimodaira-Hasegawa (SH) test.

wkh,  $P$ -value of the weighted Kishino-Hasegawa (WKH) test.

wsh,  $P$ -value of the weighted Shimodaira-Hasegawa (WSH) test.

**Supplementary Table 3** Summary of codon-based model analyses of PAML for *DFR* of *Scutellaria* species.

| Model      | np  | <i>L</i>  | $\omega$ | Parameters                                                                                                                      | $2\Delta L$ | <i>P</i> |
|------------|-----|-----------|----------|---------------------------------------------------------------------------------------------------------------------------------|-------------|----------|
| M0         | 136 | -3008.326 | 0.1994   | $\omega=0.19940$                                                                                                                | 107.168     | 0.007    |
| Free-ratio | 269 | -2954.742 |          |                                                                                                                                 |             |          |
| M1a        | 137 | -2960.644 | 0.2156   | $\omega_0 = 0.08135$ ( $p_0 = 0.85384$ )<br>$\omega_1 = 1.000$ ( $p_1 = 0.14616$ )                                              | 25.101      | 1.77E-06 |
| M2a        | 139 | -2948.094 | 0.2642   | $\omega_0 = 0.08323$ ( $p_0 = 0.84611$ )<br>$\omega_1 = 1.000$ ( $p_1 = 0.14990$ )<br>$\omega_2 = 11.00179$ ( $p_2 = 0.00398$ ) |             |          |
| M7         | 137 | -2963.044 | 0.2183   | $\alpha = 0.21788$ , $\beta = 0.77395$                                                                                          | 28.835      | 2.74E-07 |
| M8a        | 138 | -2960.352 | 0.2009   | $\alpha = 0.61415$ , $\beta = 4.81459$<br>$p_0 = 0.89683$<br>$p_1 = 0.10317$ ; $\omega_1 = 1.000$                               | 23.451      | 3.33E-07 |
| M8         | 139 | -2948.626 | 0.2408   | $\alpha = 0.27724$ , $\beta = 1.10158$<br>$p_0 = 0.99600$<br>$p_1 = 0.00400$ ; $\omega_1 = 10.85527$                            |             |          |

*L*, Log-likelihood of the data;  $\omega$ , Mean dN/dS ratio for the entire gene.

Both M2a and M8 suggest that the codon at site 253D (considering gaps) was positively selected [ $Pr(\omega > 1) = 1.000$ ] using Bayes Empirical Bayes (BEB) analysis.

**Supplementary Table 4** Inferred conserved motifs identical to the *cis*-acting elements in *DFR* introns in *Scutellaria*. The average numbers and standard deviations of the putative *cis*-acting elements are shown.

| <i>Cis</i> -acting elements | Motif                 | Dup1    |       | Dup2    |       |
|-----------------------------|-----------------------|---------|-------|---------|-------|
|                             |                       | Average | Std   | Average | Std   |
| -10PEHVPSBD                 | TATTCT                | 0.545   | 0.498 | 1.000   | 0.500 |
| 2SSEEDPROTBANAPA            | CAAACAC               | 1.000   | 0.426 | 1.000   | 0.500 |
| AACACOREOSGLUB1             | AACAAAC               | 0.000   | 0.000 | 1.000   | 0.707 |
| ABRELATERD1                 | ACGTG                 | 1.091   | 0.514 | 0.125   | 0.331 |
| ABRERATCAL                  | MACGYGB               | 1.091   | 0.514 | 0.000   | 0.000 |
| ACGTABOX                    | TACGTA                | 0.000   | 0.000 | 0.750   | 0.968 |
| ACGTATERD1                  | ACGT                  | 3.091   | 1.781 | 2.500   | 1.323 |
| AMYBOX1                     | TAACARA               | 0.000   | 0.000 | 0.375   | 0.484 |
| AMYBOX2                     | TATCCAT               | 0.818   | 0.386 | 0.000   | 0.000 |
| ANAERO1CONSENSUS            | AAACAAA               | 0.000   | 0.000 | 0.125   | 0.331 |
| ARR1AT                      | NGATT                 | 4.727   | 1.135 | 7.750   | 1.299 |
| ASF1MOTIFCAMV               | TGACG                 | 0.000   | 0.000 | 0.375   | 0.484 |
| BIHD1OS                     | TGTCA                 | 0.091   | 0.287 | 1.750   | 0.661 |
| BOXIINTPATPB                | ATAGAA                | 0.818   | 0.386 | 0.625   | 0.484 |
| BOXLCOREDCPAL               | ACCWWCC               | 0.091   | 0.287 | 0.000   | 0.000 |
| CAATBOX1                    | CAAT                  | 2.818   | 0.386 | 7.500   | 1.581 |
| CACTFTPPCA1                 | YACT                  | 8.364   | 0.771 | 12.750  | 0.968 |
| CANBNNAPA                   | CNAACAC               | 1.091   | 0.668 | 1.000   | 0.500 |
| CAREOSREP1                  | CAACTC                | 1.727   | 0.445 | 0.625   | 0.696 |
| CARGCW8GAT                  | CW <sub>8</sub> G     | 0.000   | 0.000 | 0.500   | 0.866 |
| CATATGGMSAUR                | CATATG                | 1.818   | 0.575 | 1.500   | 0.866 |
| CBFHV                       | RYCGAC                | 1.000   | 0.000 | 1.500   | 0.500 |
| CCAATBOX1                   | CCAAT                 | 0.000   | 0.000 | 0.250   | 0.433 |
| CIACADIANLELHC              | CAAN <sub>4</sub> ATC | 1.091   | 0.287 | 1.000   | 0.500 |
| CPBCSPOR                    | TATTAG                | 1.000   | 0.000 | 1.125   | 0.599 |
| CTRMCMAMV35S                | TCTCTCTCT             | 0.364   | 0.481 | 0.000   | 0.000 |
| CURECORECR                  | GTAC                  | 2.000   | 0.853 | 1.750   | 1.854 |
| DOFCOREZM                   | AAAG                  | 3.000   | 0.000 | 4.250   | 1.479 |
| DPBFCOREDCDC3               | ACACNNG               | 0.727   | 0.617 | 1.750   | 0.433 |
| EBOXBNNAPA                  | CANNTG                | 5.273   | 1.763 | 7.000   | 2.236 |
| EECCRCAH1                   | GANTTNC               | 4.000   | 1.128 | 4.500   | 0.500 |
| ELRECOREPCR1                | TTGACC                | 0.000   | 0.000 | 0.125   | 0.331 |
| GAREAT                      | TAACAAR               | 0.000   | 0.000 | 0.375   | 0.484 |
| GATABOX                     | GATA                  | 5.000   | 1.128 | 5.625   | 0.696 |
| GT1CONSENSUS                | GRWAAW                | 5.273   | 0.750 | 6.250   | 1.090 |
| GT1GMSCAM4                  | GAAAAA                | 0.909   | 0.287 | 1.750   | 0.433 |
| GT1MOTIFPSRBCS              | KWGTGRWAAWRW          | 0.455   | 0.498 | 0.625   | 0.484 |
| GTGANTG10                   | GTGA                  | 2.727   | 0.750 | 3.875   | 0.331 |
| IBOX                        | GATAAG                | 0.909   | 0.287 | 0.125   | 0.331 |
| IBOXCORE                    | GATAA                 | 2.000   | 0.739 | 0.250   | 0.433 |
| IBOXCORENT                  | GATAAGR               | 0.909   | 0.287 | 0.125   | 0.331 |
| INTRONUPPER                 | MAGGTAAGT             | 0.000   | 0.000 | 0.375   | 0.484 |
| MARABOX1                    | AATAAAYAAA            | 0.000   | 0.000 | 0.125   | 0.331 |
| MARTBOX                     | TTWTWTTWTT            | 0.182   | 0.575 | 0.875   | 0.331 |
| MYB1AT                      | WAACCA                | 0.182   | 0.386 | 0.375   | 0.484 |
| MYB2AT                      | TAACTG                | 0.000   | 0.000 | 0.250   | 0.433 |
| MYB2CONSENSUSAT             | YAACKG                | 0.364   | 0.481 | 0.250   | 0.433 |
| MYBCORE                     | CNGTTR                | 0.455   | 0.498 | 1.125   | 0.599 |
| MYBCOREATCYCB1              | AACGG                 | 0.364   | 0.481 | 0.000   | 0.000 |
| MYBGAHV                     | TAACAAA               | 0.000   | 0.000 | 0.375   | 0.484 |
| MYBPLANT                    | MACCWAMC              | 0.182   | 0.386 | 0.000   | 0.000 |
| MYBPZM                      | CCWACC                | 0.091   | 0.287 | 0.000   | 0.000 |
| MYBST1                      | GGATA                 | 1.000   | 0.603 | 0.125   | 0.331 |
| MYCATERD1                   | CATGTG                | 0.182   | 0.386 | 1.000   | 0.866 |
| MYCATRD22                   | CACATG                | 0.182   | 0.386 | 1.000   | 0.866 |

| <i>Cis</i> -acting elements | Motif                     | Dup1    |       | Dup2    |       |
|-----------------------------|---------------------------|---------|-------|---------|-------|
|                             |                           | Average | Std   | Average | Std   |
| MYCCONSENSUSAT              | CANNTG                    | 5.273   | 1.763 | 7.000   | 2.236 |
| NAPINMOTIFBN                | TACACAT                   | 0.182   | 0.386 | 0.000   | 0.000 |
| NODCON1GM                   | AAAGAT                    | 0.000   | 0.000 | 0.125   | 0.331 |
| NODCON2GM                   | CTCTT                     | 0.364   | 0.481 | 1.000   | 0.500 |
| NTBBF1ARROLB                | ACTTTA                    | 0.545   | 0.498 | 0.750   | 0.433 |
| OSE1ROOTNODULE              | AAAGAT                    | 0.000   | 0.000 | 0.125   | 0.331 |
| OSE2ROOTNODULE              | CTCTT                     | 0.364   | 0.481 | 1.000   | 0.500 |
| POLASIG1                    | AATAAA                    | 0.182   | 0.575 | 1.000   | 0.500 |
| POLASIG3                    | AATAAT                    | 0.091   | 0.287 | 1.375   | 0.484 |
| POLLEN1LELAT52              | AGAAA                     | 5.818   | 0.386 | 5.500   | 1.581 |
| PREATPRODH                  | ACTCAT                    | 0.091   | 0.287 | 0.375   | 0.484 |
| PRECONSCRHSP70A             | SCGAYNRN <sub>15</sub> HD | 0.091   | 0.287 | 0.875   | 0.331 |
| QARBNEXTA                   | AACGTGT                   | 0.909   | 0.287 | 0.000   | 0.000 |
| RAV1AAT                     | CAACA                     | 1.909   | 0.514 | 3.375   | 0.992 |
| RAV1BAT                     | CACCTG                    | 0.000   | 0.000 | 0.125   | 0.331 |
| RBCSCONSENSUS               | AATCCAA                   | 0.727   | 0.445 | 0.000   | 0.000 |
| REALPHALGLHCB21             | AACCAA                    | 0.909   | 0.287 | 0.375   | 0.484 |
| ROOTMOTIFTAPOX1             | ATATT                     | 2.636   | 0.481 | 3.500   | 1.500 |
| S1FBOXSORPS1L21             | ATGGTA                    | 0.000   | 0.000 | 0.125   | 0.331 |
| SEBFCONSSTPR10A             | YTGTCWC                   | 0.000   | 0.000 | 0.875   | 0.331 |
| SEF1MOTIF                   | ATATTTAWW                 | 0.000   | 0.000 | 0.625   | 0.484 |
| SEF3MOTIFGM                 | AACCCA                    | 0.091   | 0.287 | 0.000   | 0.000 |
| SEF4MOTIFGM7S               | RTTTTTR                   | 1.182   | 0.575 | 0.750   | 0.433 |
| SITEIIATCYTC                | TGGGCY                    | 0.182   | 0.386 | 0.000   | 0.000 |
| SORLIP1AT                   | GCCAC                     | 0.000   | 0.000 | 0.125   | 0.331 |
| SORLIP5AT                   | GAGTGAG                   | 0.000   | 0.000 | 0.625   | 0.484 |
| SP8BFIBSP8BIB               | TACTATT                   | 0.909   | 0.287 | 0.000   | 0.000 |
| SREATMSD                    | TTATCC                    | 0.182   | 0.386 | 0.000   | 0.000 |
| SURE2STPAT21                | AATACTAAT                 | 0.000   | 0.000 | 0.250   | 0.433 |
| SV40COREENHAN               | GTGGWWHG                  | 0.182   | 0.386 | 0.000   | 0.000 |
| T/GBOXATPIN2                | AACGTG                    | 1.091   | 0.514 | 0.000   | 0.000 |
| TAAAGSTKST1                 | TAAAG                     | 1.000   | 0.426 | 1.125   | 0.781 |
| TATABOX2                    | TATAAAT                   | 0.000   | 0.000 | 0.750   | 0.433 |
| TATABOX3                    | TATTAAT                   | 0.091   | 0.287 | 0.125   | 0.331 |
| TATABOX4                    | TATATAA                   | 0.182   | 0.386 | 0.000   | 0.000 |
| TATABOX5                    | TTATTT                    | 0.182   | 0.575 | 1.250   | 0.829 |
| TATCCACHVAL21               | TATCCAC                   | 0.000   | 0.000 | 0.125   | 0.331 |
| TATCCAOSAMY                 | TATCCA                    | 1.000   | 0.603 | 0.125   | 0.331 |
| TATCCAYMOTIFOSRAMY3D        | TATCCAY                   | 0.818   | 0.386 | 0.125   | 0.331 |
| TGTCACACMCUCUMISIN          | TGTCACA                   | 0.000   | 0.000 | 0.875   | 0.331 |
| WBOXPCWRKY1                 | TTTGACY                   | 0.000   | 0.000 | 0.125   | 0.331 |
| WBOXATNPR1                  | TTGAC                     | 0.000   | 0.000 | 0.625   | 0.696 |
| WBOXHVIS01                  | TGACT                     | 0.000   | 0.000 | 1.000   | 0.500 |
| WBOXNTERF3                  | TGACY                     | 0.818   | 0.386 | 1.875   | 0.599 |
| WRKY71OS                    | TGAC                      | 0.909   | 0.514 | 4.000   | 0.866 |

Supplementary Fig. 1 Phylogenetic analysis of angiosperm *DFR*.

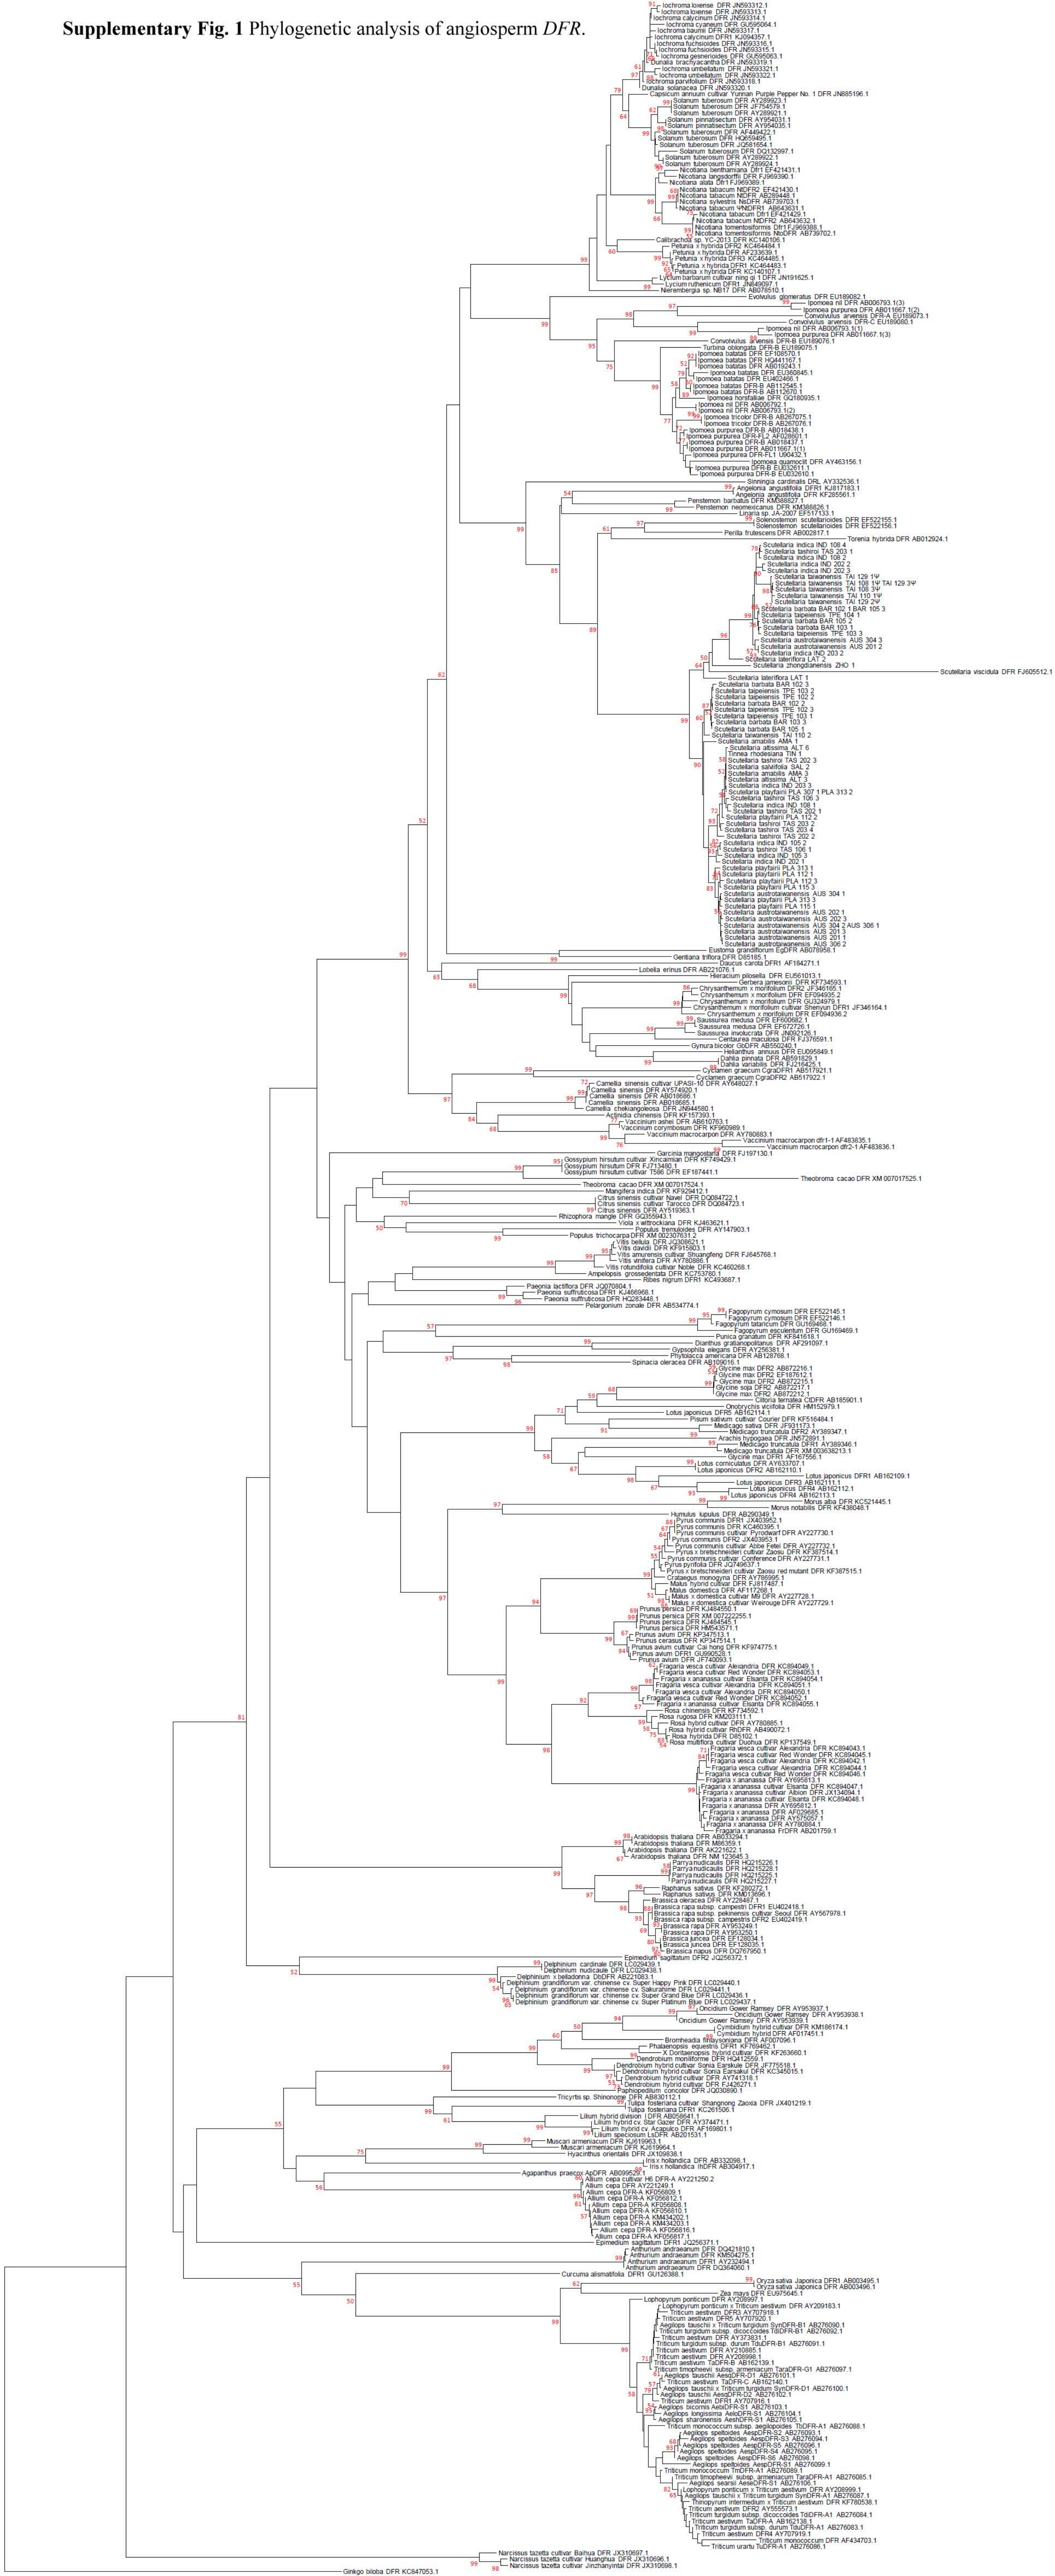

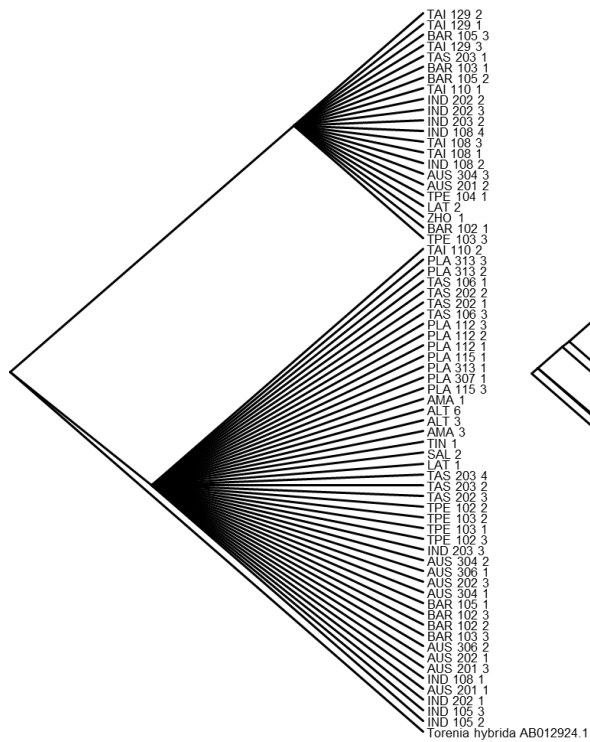

H1: Speciation after duplication

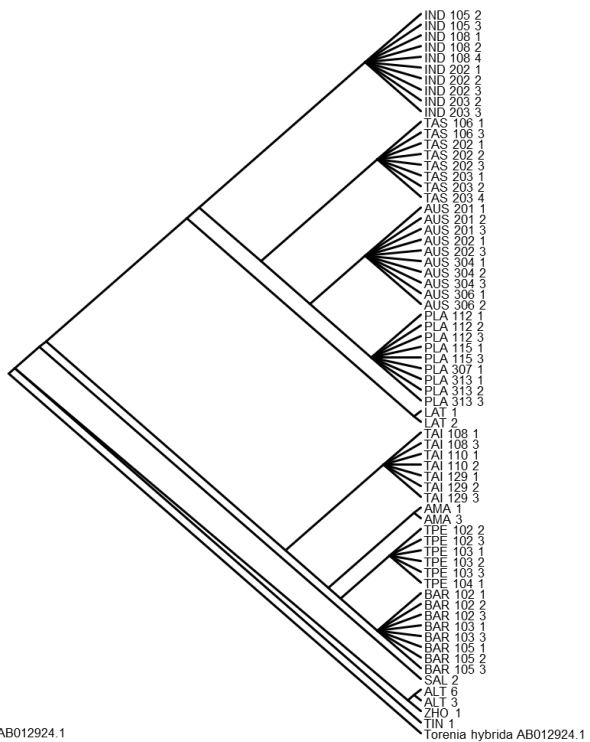

H2: Duplication after speciation

**Supplementary Fig. 2** Tree topologies of duplication hypotheses of *Scutellaria DFR*.

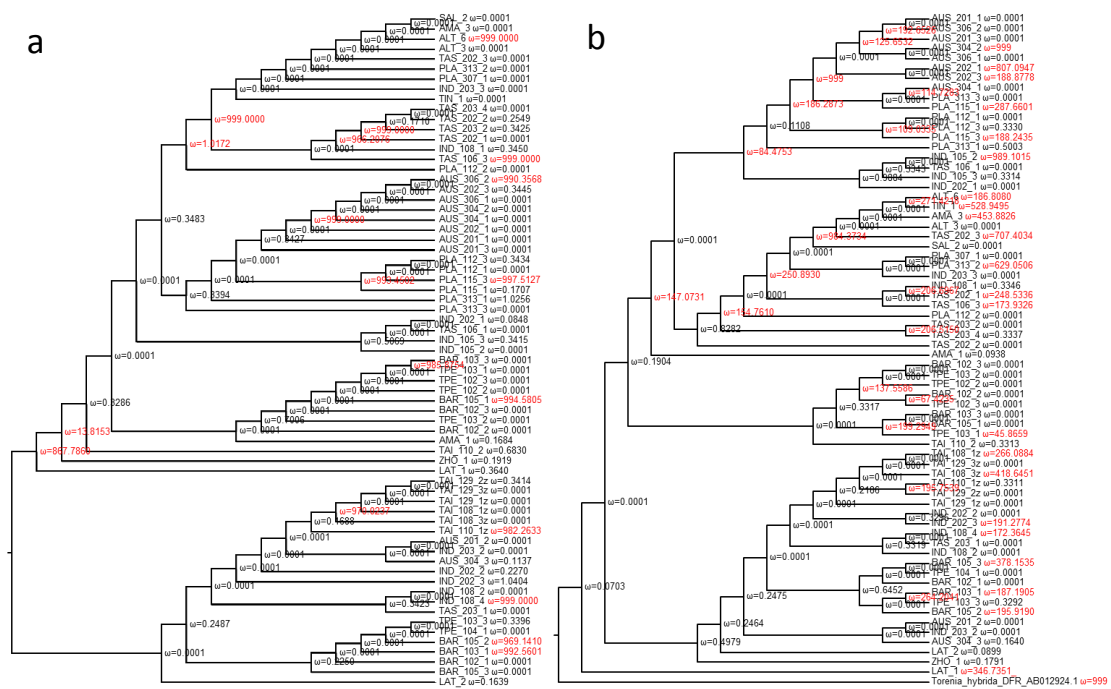

**Supplementary Fig. 3** The  $\omega$  values of each branch inferred by the free-ratio model of PAML using (a) intron tree and (b) exon tree as the input user tree.



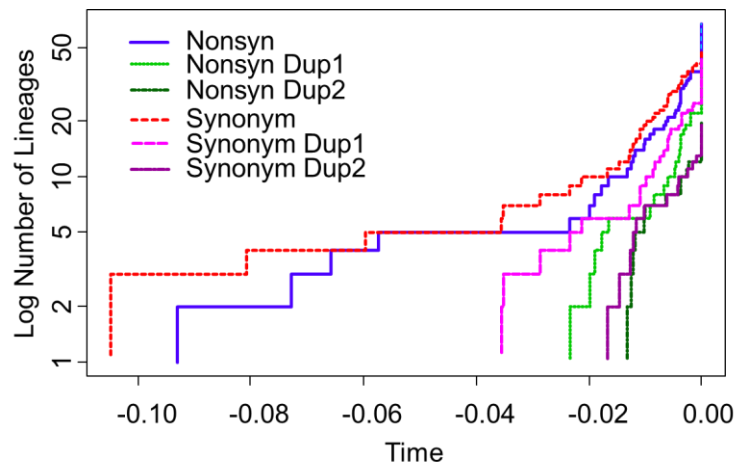

**Supplementary Fig. 4** Lineage-through-time (LTT) plots of nonsynonymous and synonymous trees of *Scutellaria DFR*.

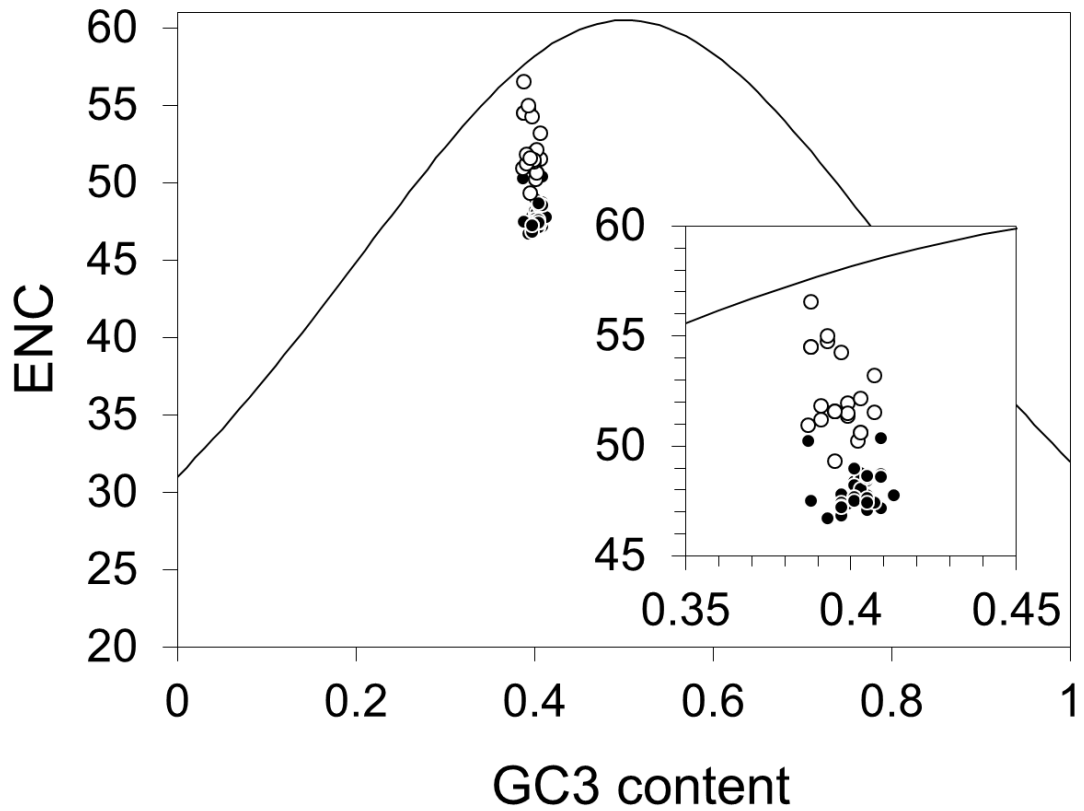

**Supplementary Fig. 5** ENC-plot depicting the effective number of codons (ENCs) plotted against G+C content at synonymous third codon positions (GC3) of Dup1 (filled circles) and Dup2 (open circles) of *Scutellaria DFR*. The curve denotes the relationship between GC3 and ENC in the absence of selection (neutral). The inner panel zooms in on the ENC plot of *Scutellaria DFR*.
